# Supplementary material
Source: PubMed Central journal article supplement (PMC5652586)

SUPPLEMENTARY DATA

**Supplementary Figure S1.** Correlation between the change in myocardial glucose uptake and : [A] change in HbA1c and [B] change in plasma free fatty acid (FFA) concentration following pioglitazone treatment.

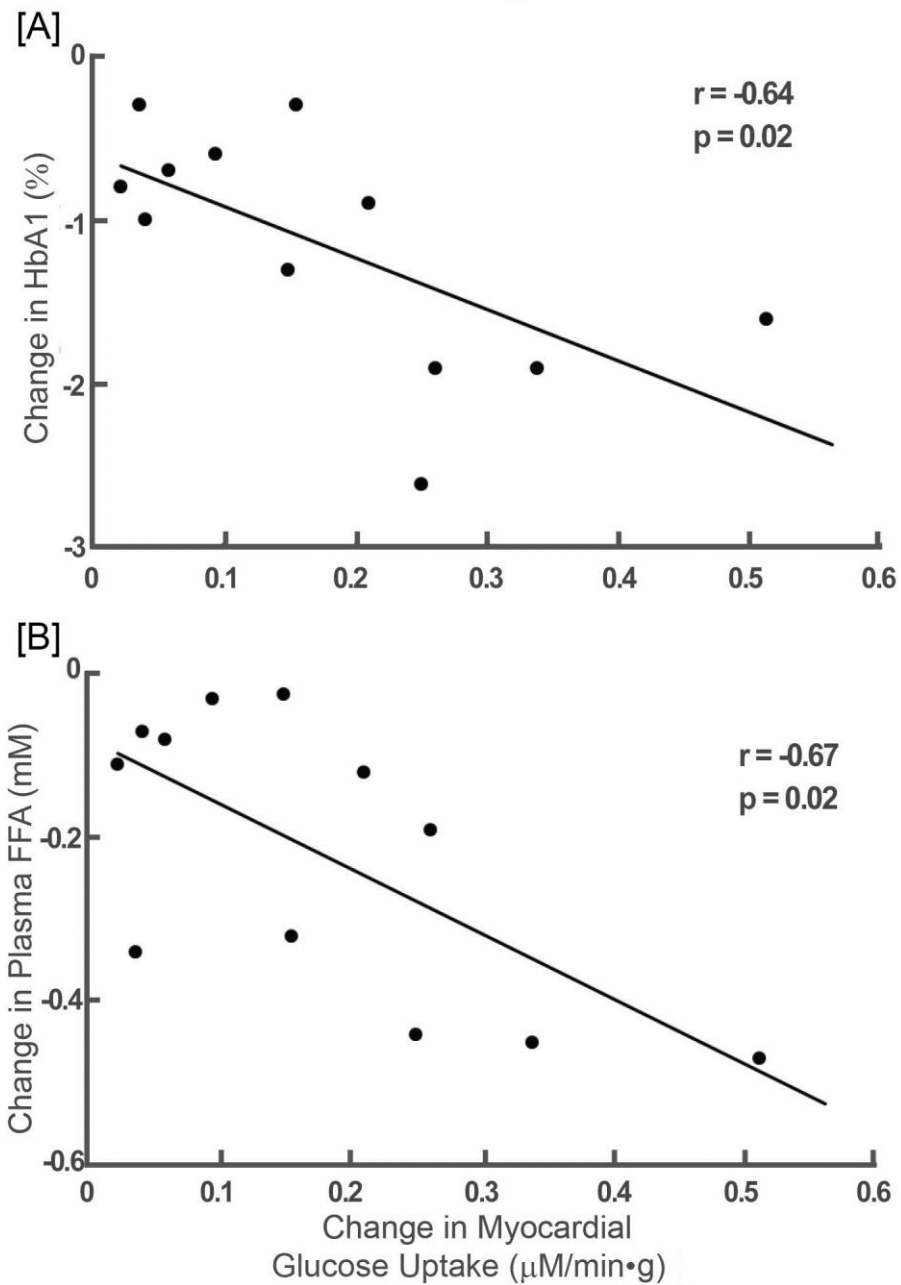

Supplement: DC170078SupplementaryData.pdf [file DC170078SupplementaryData.pdf]
